# Supplementary material
Source: Springer Nature journal article supplement (https://www.springermedizin.de/resource/supplementary/12882_2011_331_MOESM1_ESM.pdf/9453722)
Supplement: MOESM1 [file 9453722]

| Timeline          | Intervention group | Control group |
|-------------------|--------------------|---------------|
| Randomization     |                    |               |
| Baseline (time 0) | a c d              | a c d         |
| Weeks 1-7         | b e                | e             |
| Week 8            | a b c d            | a c d         |
| Weeks 9-15        | b e                | e             |
| Week 16           | a b c d            | a c d         |
| Weeks 17-23       | e                  | e             |
| Week 24           | a b c              | a c d         |

|   |                                                                                                                                                                                                                                                                      |
|---|----------------------------------------------------------------------------------------------------------------------------------------------------------------------------------------------------------------------------------------------------------------------|
| a | Questionnaire: demographic and socioeconomic data; behavioral characteristics (physical activity, smoking and alcohol consumption); clinical data (length of time with diagnosis of hypertension and anti-hypertensive medications currently used); quality of life. |
| b | Three 60-75 minutes sessions per week of supervised exercise                                                                                                                                                                                                         |
| c | Physical exam: anthropometric data (weight, height and waist circumference), measurement of blood pressure in the upper and lower limbs, index ankle-arm                                                                                                             |
| d | Laboratory analyses (venous blood and urine sample collection) for hemogram, creatinine, lipid profile, blood glucose, serum albumin, ultrasensitive C-reactive protein, proteinuria and creatininuria                                                               |
| e | Will continue to receive the usual attendance provided by the primary health care unit.                                                                                                                                                                              |
